# Supplementary material
Source: Royal Society of Chemistry journal article supplement (https://www.rsc.org/suppdata/dt/1998/1293/k708988.doc)
Supplement: Supplementary file 1 [file k708988.doc]

RSC Electronic Supplementary Information

A complete analysis of the IR and Raman spectra of compound [Cr(NCMe)4][BF4]2 was performed. The compound was prepared from Cr2(O2CCH3)4 and HBF4 in NCCH3 solvent and was crystallographically characterized.

The complex should have a center of symmetry which is clearly seen from the alternativity of the IR and Raman bands below 500 cm-1 (metal-ligand motions). Because of the weak interactions between the CN stretching modes, we were able to detect two IR and Raman pairs of bands rather close to each other. It means that in this situation the CN stretches are not able to express the "real" symmetry of the molecule. If the Cr(CH3CN)4 cation displays D4h symmetry only one IR CN stretching band should be observed, but we observe two (see Table below). Therefore, the complex should have a lower symmetry then D4h with the preservation of the inversion center. Only C2h symmetry allowes two CN stretching modes to appear in the IR spectra. Two IR and two Raman bands without coincidences, as they can be actually observed, reflect exactly the C2h symmetry. It is also not possible to assign the BF4- anions as tetrahedral. The strong splittings of the triple degenerate BF stretching band at 1050 cm-1 and the appearance of a symmetric BF4 stretching mode as an IR band at 767 cm-1 suggest a lowering of the symmetry. This is in good agreement with the structural results, showing a coordination of the BF4 ions to the Cr center *via* one fluorine atom.

**Table**  Characteristic IR and Raman Bands of [Cr(NCCH3)4][BF4]2 [cm-1]

| IR in solid state  (Nujol) | IR in solution  (CH3CN) | Raman in solid state | Assignments |
| --- | --- | --- | --- |
|  | 2998 m | 3010 m | CH3 asym. str. |
|  | 2934 m | 2944 vs | CH3 sym. str. |
| 2333 s  2303 vs | 2225 vs  2399 s | 2332 vs  2305 vs | bu  ag CN str.  bg  au |
|  |  | 1416 m | CH3 asym. def. |
| 1366 s,n  1262 w | 1360 vw,b  1259 vw | 1367 s  1266 w | CH3 sym. def. |
|  | 1057 vs  1046 vs  1032 vs |  | BF4- asym. str (f2),  IR |
|  | (1032 vs) | 1030 w | CH3 rock |
|  | 957 vw | 958 vw  828 vw  812 vw | CC str. (acetonitrile) |
|  | 767 vw  723 vvw | 764 s  727 vw  647 vvw | BF4- sym str. (a1), Raman |
| 520 m | 520 w |  | BF4- deform. (f2),  IR |
| 481 vw  436 vs, b |  | 420 vs | CCN deform. |
| 380 m |  | 353 w | BF4- deform. (e) |
| 241 w  233 w |  | 280 w  227 m | bg  bu CrN str.  au  ag |
| 120 m,b  106 m,b |  |  | NCrN deform. |
